# Supplementary material for: Modeling the spatiotemporal questing density of Rhipicephalus bursa and Hyalomma lusitanicum in central-southern Spain: insights for tick-borne pathogen transmission risk
Source: Research Square preprint supplement (doi:10.21203/rs.3.rs-6302030/v1), 2025-04-22
Supplement: Supplementary file 1 [file f77e6d3c704f02d8126faa80.docx]

**Additional files**

**Additional file 1.** Table with the geographic location of each of the eight sampling sites, including the region to which they belong, the coordinates in decimal degrees, the average altitude (meters above sea level), the total land surface surveyed during the study along with the total number of surveys, and the years in which each survey site was sampled.

| Site | Region | Longitude | Latitude | Altitude | Surface | Samplings | Years |
| --- | --- | --- | --- | --- | --- | --- | --- |
| *Z1* | *clm* | -4.267746° | 38.443634° | 883 m. | 40,780 m2 | 64 | 2019-2021 |
| *Z2* | *clm* | -3.682869° | 39.243462° | 950 m. | 33,980 m2 | 44 | 2019-2021 |
| *Z3* | *clm* | -4.275522° | 38.897910° | 770 m. | 35,960 m2 | 69 | 2019-2021 |
| *Z4* | *clm* | -4.058947° | 39.375110° | 800 m. | 64,050 m2 | 111 | 2019-2021 |
| *Z5* | *clm* | -2.862265° | 38.922526° | 840 m. | 46,880 m2 | 88 | 2019-2021 |
| *Z6* | *cad* | -5.742560° | 36.249532° | 28 m. | 24,900 m2 | 23 | 2004-2006 /  2022-2023 |
| *Z7* | *cad* | -5.755937° | 36.289190° | 139 m. | 32,850 m2 | 31 | 2004-2006  2022-2023 |
| *Z8* | *cad* | -5.740226° | 36.285460° | 53 m. | 37,390 m2 | 32 | 2004-2006 /  2022-2023 |

**Additional file 2.** Graphs showing the questing density of adult *Hyalomma lusitanicum* for the survey sites and years in: **A**) *clm*; and **B**) *cad*. It should be noted that the scale of each graph is different to highlight the variations between years and sites. The scale between regions is not homogenized for adequate visualization. The dashed lines indicate the end of each calendar year. Densities are expressed as ticks per hectare.

**Additional file 3.** Graphs showing the questing density of adult *Rhipicephalus bursa* for the survey sites and years in: **A**) *clm* and **B**) *cad*. The dashed lines indicate the end of each calendar year. Densities are expressed as ticks per hectare.

**Additional file 4.** Calibration plots of the temporal models parameterized with 70% of the database and validated with the remaining 30%. The X-axis represents the model predicted *H. lusitanicum* (**A**) and *R. bursa* (**B**) adult questing density, and the Y-axis represents the observed values of the validation dataset. The graph is only a random representation of the 100 performed, whose correlation coefficient and the range of correlation coefficients of the 100 replicates are in the top-left part of the chart.

**Additional file 5.** Plots illustrating the residual analysis for the temporal questing density models of *H. lusitanicum* (**A**) and *R. bursa* (**B**). Plots were generated using the ‘testUniformity’ function to the object created after applying the ‘simulateResiduals’ function, both functions in the ‘DHARMa’ package of R. The plot presents the results of the Kolmogorov-Smirnov (KS) normality test, demonstrating no deviations from normality. In the *H. lusitanicum* model, no deviations from normality were observed, while the *R. bursa* model showed a slight deviation from normality.

**Additional file 6.** Graphs showing the deviance explained by the pure effect of each variable for the spatial models of *H. lusitanicum* (A) and *R. bursa* (B). Codes refer to Table 2 variables.

**Additional file 7.** Plots illustrating the residual analysis for the spatial questing density models of *H. lusitanicum* (**A**) and *R. bursa* (**B**). Plots were generated using the ‘testUniformity’ function to the object created after applying the ‘simulateResiduals’ function, both functions in the ‘DHARMa’ package of R. The plot presents the results of the Kolmogorov-Smirnov (KS) normality test, demonstrating no deviations from normality, the dispersion test, which indicates no dispersion issues in the residuals, and the outlier test, which shows no significant proportion of outliers in the model residuals.

**Additional file 8. Maps depicting the land use categories considered in the study across the entire provinces of ‘Ciudad Real’ (A) and ‘Cádiz’ (B). ‘*Water bodies’,* and ‘*Others’* categories were not considered for statistical procedures. Study sites are delineated within a red rectangular frame. The data used is sourced from Corine Land Cover** (European Environment Agency, 2018) at a spatial scale of 1:100,000.

**Additional file 9. Maps depicting the soil permeability categories considered in the study across the provinces of ‘Ciudad Real’ (A) and ‘Cádiz’ (B). Study sites are delineated within a red rectangular frame. The data used is** provided by Geological and Mining Institute of Spain (IGME, 2009), available at a spatial scale of 1:200,000.

**Additional file 10.** Graphs showing the annual phenology of each developmental stage of *H. lusitanicum* in the *clm* (**A**) and *cad* (**B**) regions. Blue lines represent adult density, orange lines represent nymph density, and red lines represent larva density. Densities are expressed as ticks per hectare.

**Additional file 11**. Land surface temperature and NDVI variations over the years of the study in *clm* region.

**Additional file 12.** Land surface temperature and NDVI variations over the years of the study in *cad* region.

**Additional file 13.** Maps displaying the average values and variations in annual NDVI and the average values for *cad* (**A**) and *clm* (**B**) regions. The values on the maps are represented by 250x250 m pixels.

**Additional file 14.** Maps displaying the average values and annual variation of land surface temperature – LST - for *cad* (**A**) and *clm* (**B**) regions. Temperature scale has not been standardized for better data visualization. The values on the maps are represented by 1x1 km pixels.

**Additional file 15.** Graphs showing the annual phenology of each developmental stage of *R. bursa* in the *clm* (**A**) and *cad* (**B**) regions. Blue lines represent adult density, orange lines represent nymph density, and red lines represent larva density. Densities are expressed as ticks per hectare.
